# Supplementary material for: Heterogenous Preparations of Solution-Processable Cobalt Phthalocyanines for Carbon Dioxide Reduction Electrocatalysis
Source: MDPI journal article supplement (doi:10.3390/inorganics11010043), 2023-01-15
Supplement: s1 [file s1]

Archive with 1 entries (1 files):
- inorganics-2135190-supplementary.pdf
